# Supplementary material for: Mutant IL7R collaborates with MYC to induce T-cell acute lymphoblastic leukemia
Source: PubMed Central journal article supplement (PMC9162918; doi:10.1038/s41375-022-01590-5), 2022-05-17
Supplement: 41375_2022_1590_MOESM1_ESM.pdf [file 41375_2022_1590_MOESM1_ESM.pdf]

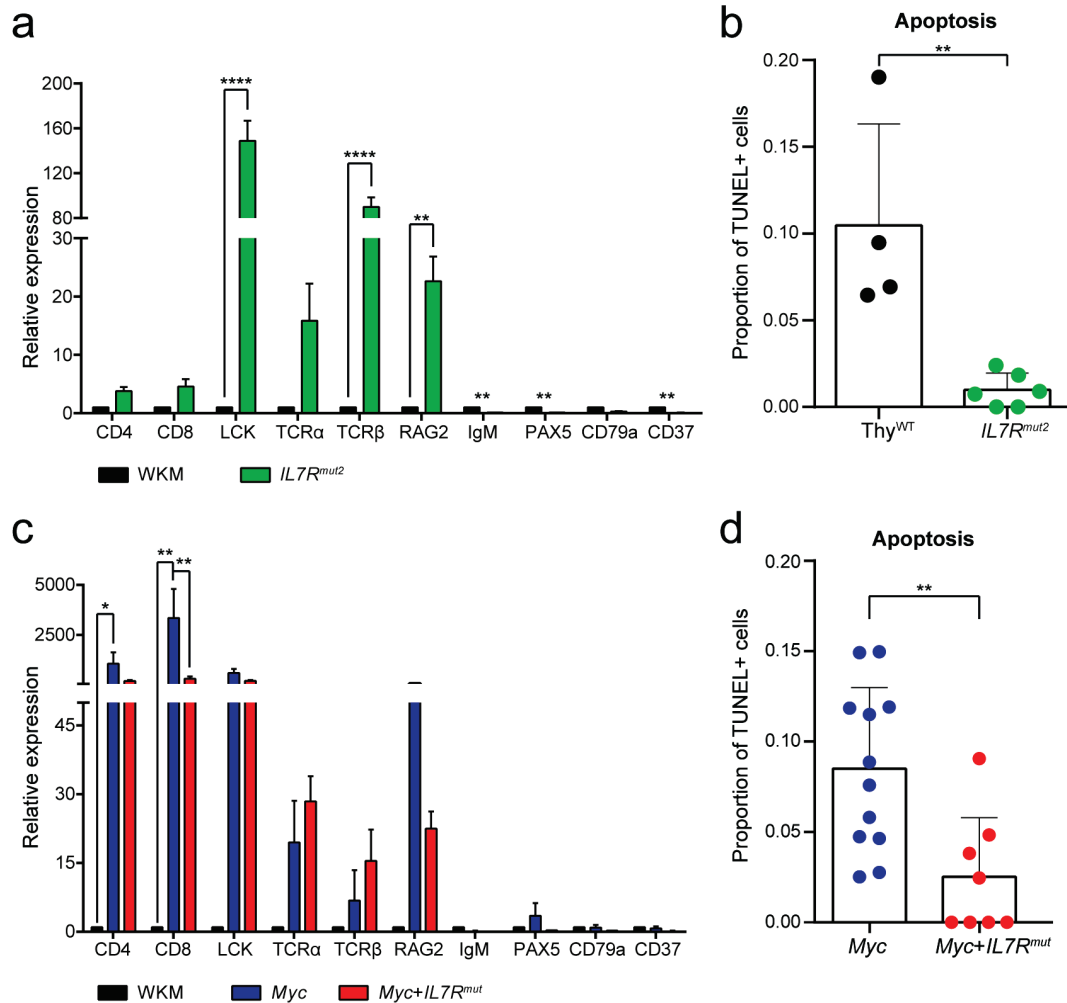

**Supplementary Figure S1. Mutant *IL7R* decreases apoptosis of leukemia cells. (a)** qRT-PCR gene expression analysis of the T-cell specific genes *lck*, *CD4*, *CD8*, *TCRα*(...), and the B-cell specific genes *IgM*, *Pax5*, *CD79a*(...), in tdTomato-positive T-ALL cells from stable transgenic animals ( $n = 5$ , run in triplicate); Samples were normalized to  $\beta$ -actin expression and gene expression is shown relative to bulk WKM cells isolated from normal CG1-strain fish; \*\*,  $P < 0.01$ , \*\*\*,  $P < 0.001$  and \*\*\*\*,  $P < 0.0001$ , Two-way ANOVA Error bars denote SEM. **(b)** Quantification of IHC data; Each dot represents a thymus or primary leukemia, and mean value is shown; \*\*,  $P < 0.01$ ; Error bars denote SD. **(c)** qRT-PCR gene expression comparing *Myc* and *Myc+IL7R<sup>mut</sup>* expressing T-ALLs ( $n > 3$  per genotype, run in triplicate) with bulk whole kidney marrow (WKM) cells isolated from normal Tu/AB-strain fish; \*,  $P < 0.05$  and \*\*,  $P < 0.01$ , Two-way ANOVA; Error bars denote SEM. **(d)** Quantification of IHC data; Each dot represents a single primary leukemia and mean value is shown; \*\*,  $P < 0.01$ , Mann Whitney test; NS, not significant; Error bars denote SEM.
